# Supplementary material for: Anti-TGF-β/PD-L1 bispecific antibody promotes T cell infiltration and exhibits enhanced antitumor activity in triple-negative breast cancer
Source: PubMed Central journal article supplement — J Immunother Cancer. 2022 Dec 2;10(12):e005543. doi: 10.1136/jitc-2022-005543 (PMC9723957; doi:10.1136/jitc-2022-005543), 2022-12-02
Supplement: jitc-2022-005543supp001.pdf [file jitc-2022-005543supp001.pdf]

**Figure S1: The binding affinity to Fc receptors and antibody-dependent cell-mediated cytotoxicity (ADCC) effect of BiTP.** (a-e) enzyme linked immunosorbent assay to determine the binding affinity to Fc receptors. (f) Flow cytometry to measure ADCC activity. The molecular weights of the light chain and heavy chain. H358 cells were stained with 2.5  $\mu$ M carboxyfluorescein diacetate succinimidyl ester (CFSE) buffer (containing 1% FBS) at 37 °C for 15 minutes. Then, H358 cells were washed by medium and seeded into 96 well plates. The next day, NK92MI-CD16A and serially diluted BiTP were added to plates. The plates were incubated at 37 °C for six hours. Afterward, after treatment with propidium iodide, the ratio of dead cells was measured by flow cytometry.

**Figure S2: Mass spectrometry to measure the molecular weight of BiTP** (a) The molecular weight of the intact antibody. (b-c) The molecular weights of heavy chain and light chain.

**Figure S3: Surface Plasmon Resonance Biacore to determine the affinities and kinetics of BiTP.** (a) The affinities and kinetics of anti-TGF- $\beta$  moiety. (b) The affinities and kinetics of anti-PD-L1 moiety.

**Figure S4: Flow cytometry and western blotting assays to measure the effect of BiTP on TGF- $\beta$ -mediated Treg induction and epithelial-mesenchymal transition.** (a) Plates were coated with 10  $\mu$ g/ml anti-human CD3 at 37°C for two hours. The hPBMCs were maintained in RPMI-1640 with 10% FBS, 100 U/ml interleukin-2, 5  $\mu$ g/ml anti-CD28, 20 ng/ml TGF- $\beta$ 1, and BiTP for six days. (b) MCF-7 and BT474 were cultured with RPMI-1640 with 10% FBS, 20 ng/ml TGF- $\beta$ 1, and BiTP for four days. Then, cells were harvested for western blotting.

**Figure S5: Differentially expressed genes analysis for BiTP-treated 4T1-hPDL1 tumors.** (a) Venn diagrams showing the overlap of differentially expressed genes (upregulated in BiTP-treated tumors). (b) Venn diagrams showing the overlap of differentially expressed genes (downregulated in BiTP-treated tumors). (c) Bubble diagrams showing enriched pathways of overlapping differentially expressed genes (upregulated in BiTP-treated tumors). (d) Bubble diagrams showing enriched pathways of non-overlapping differentially expressed genes (upregulated in BiTP-treated tumors). (e) The principal component analysis based on expression profiles showing sample similarities.

**Figure S6: Multiplex immunohistochemical (IHC) and IHC staining to explore the effect of BiTP on epithelial-mesenchymal transition in 4T1-hPD-L1 tumors.** (a) Anti-Vimentin multiplex IHC staining. (b) Anti-E-cadherin IHC staining.

**Figure S7: Immunohistochemical (IHC) staining to explore the effect of BiTP on tumor cell apoptosis and proliferation in 4T1-hPD-L1 tumors.** (a) Anti-Cleaved Caspase 3 IHC staining. (b) Anti-Ki67 IHC staining. (c) Anti-PCNA IHC staining.

**Figure S8: The expression of *Cd274* and *Tgfb1* in RNA-seq assay.** (a) *Cd274* mRNA level. (b) *Tgfb1* mRNA level.

Figure S1

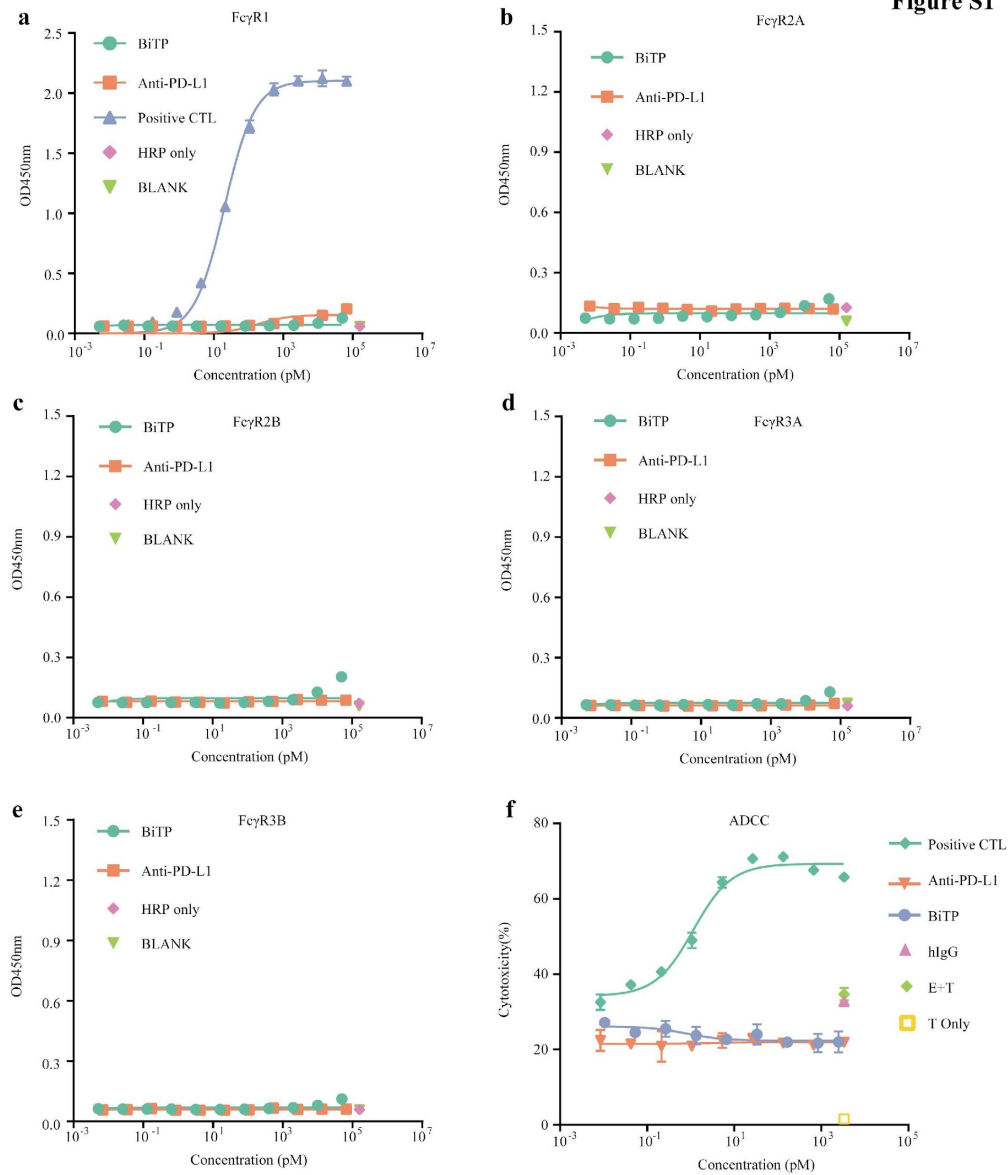

Figure S2

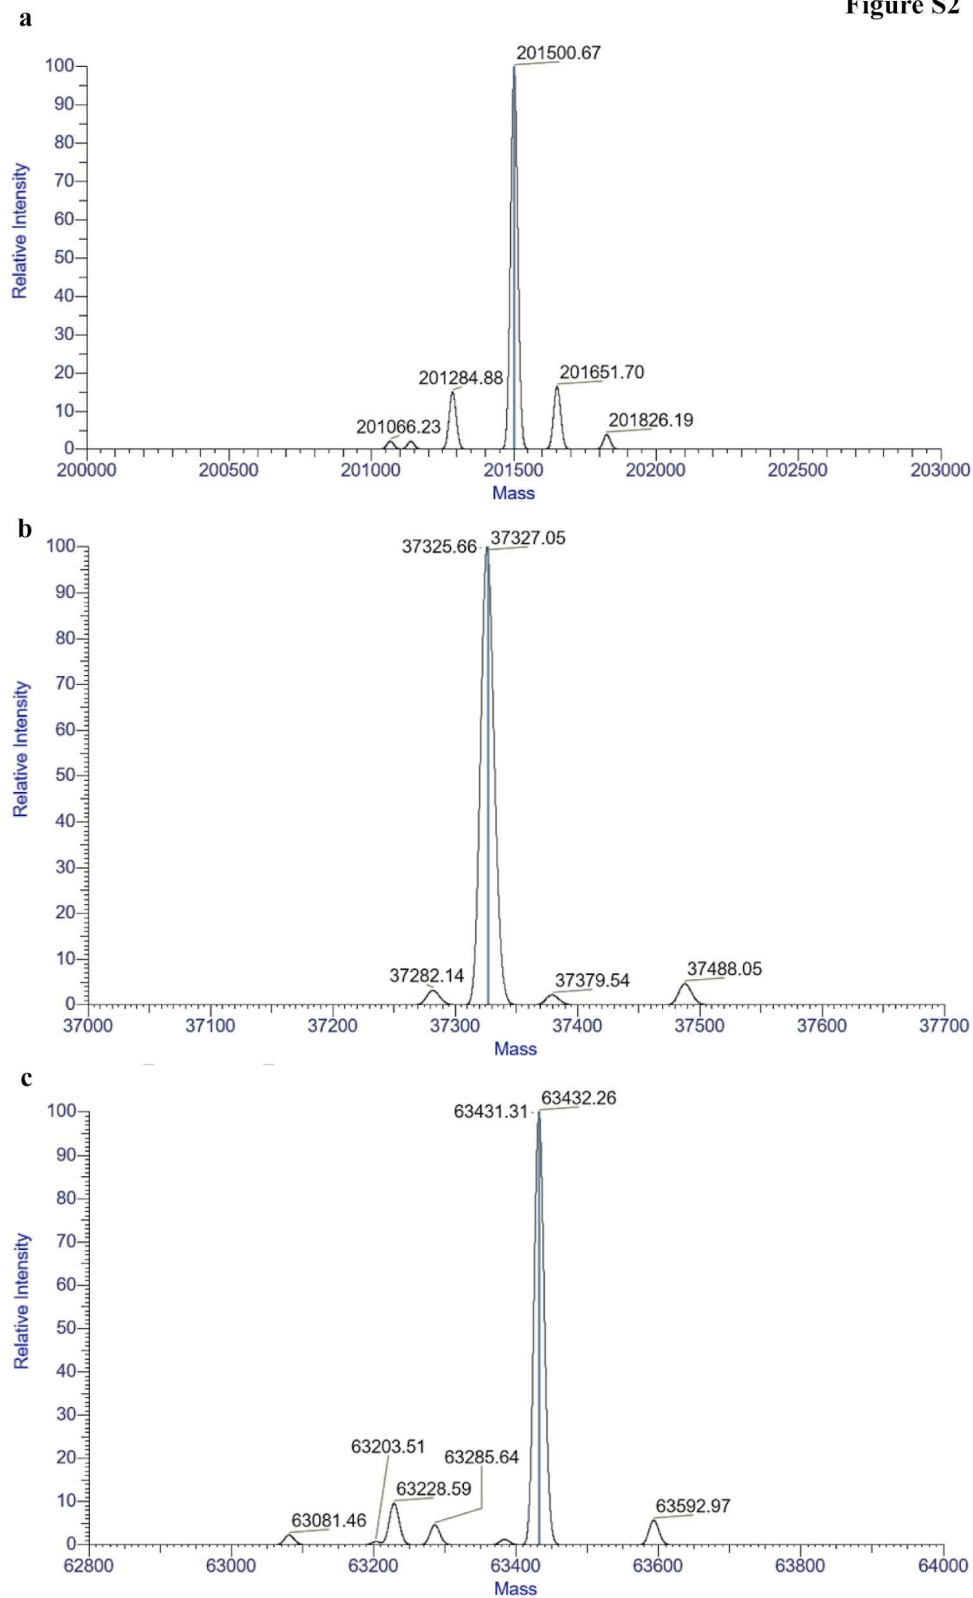

Figure S3

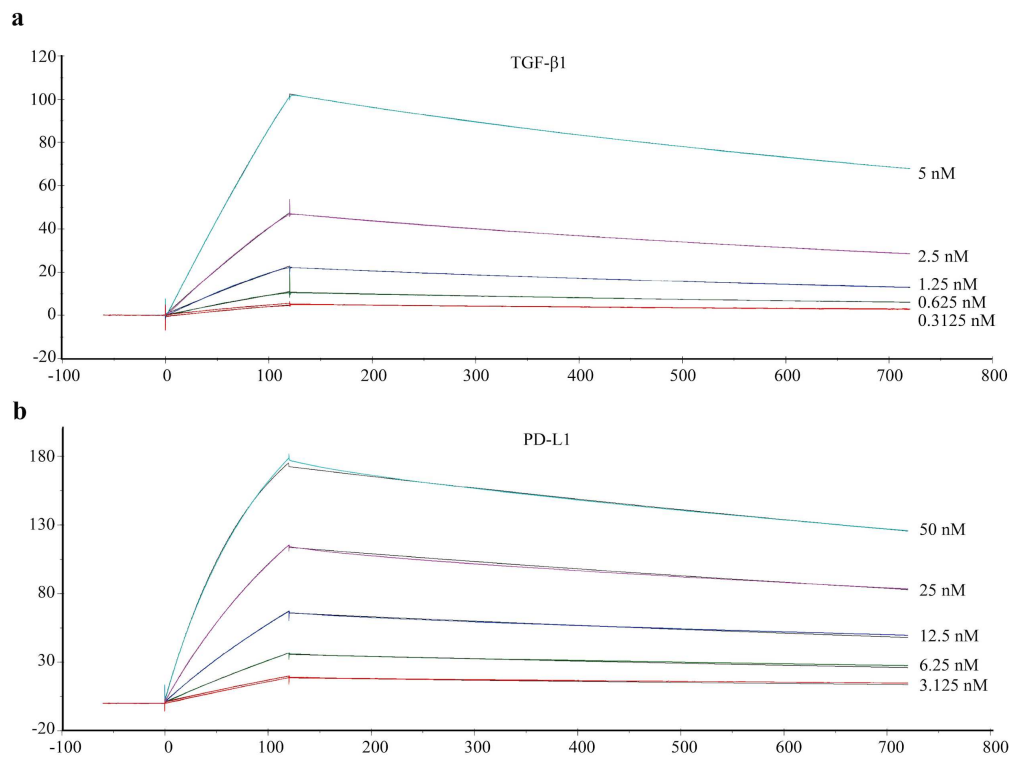

**Figure S4**

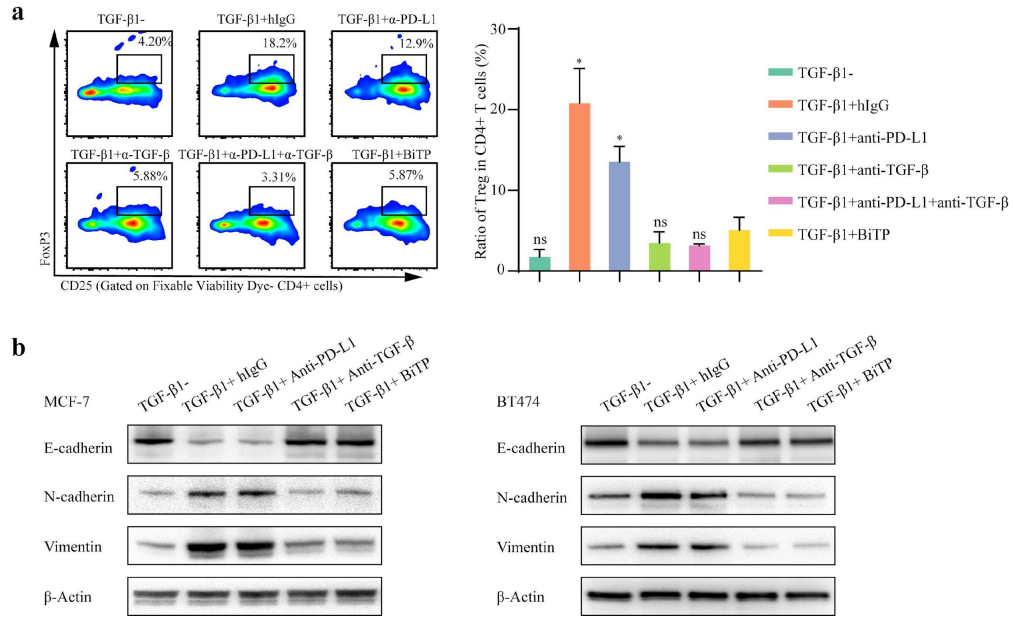

**Figure S5**

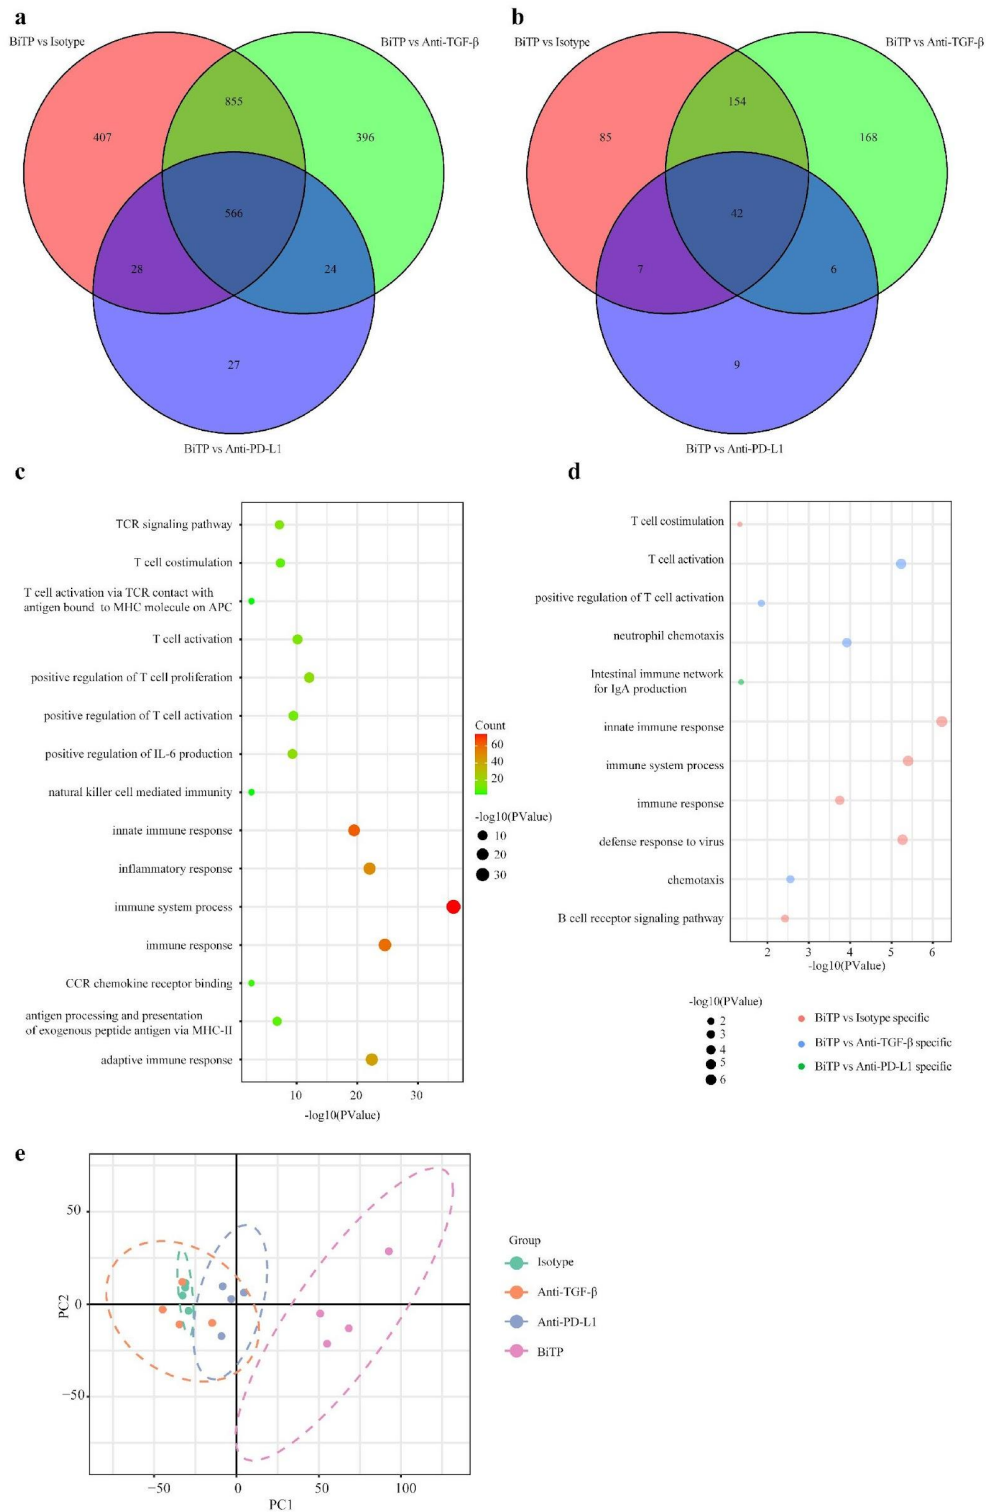

Figure S6

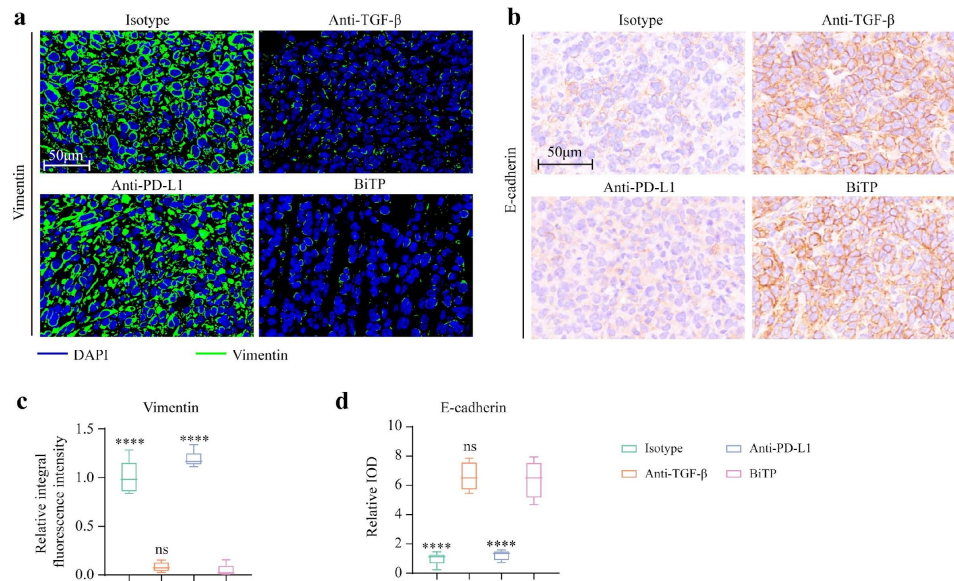

Figure S7

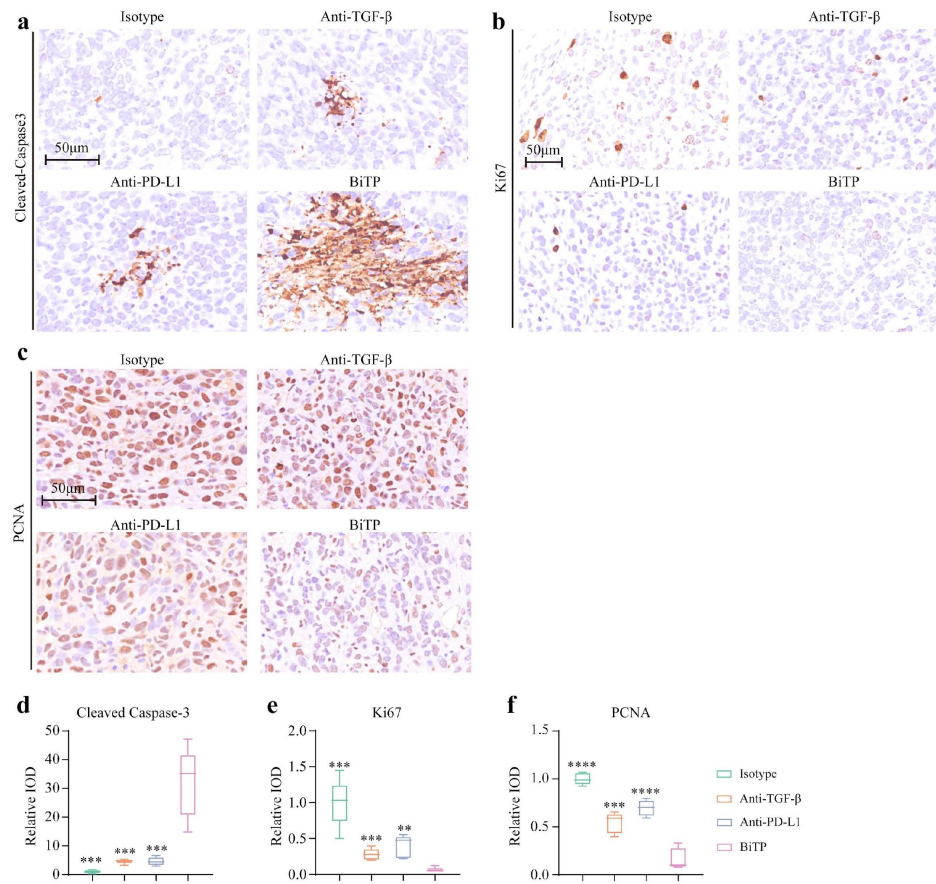



Figure S8

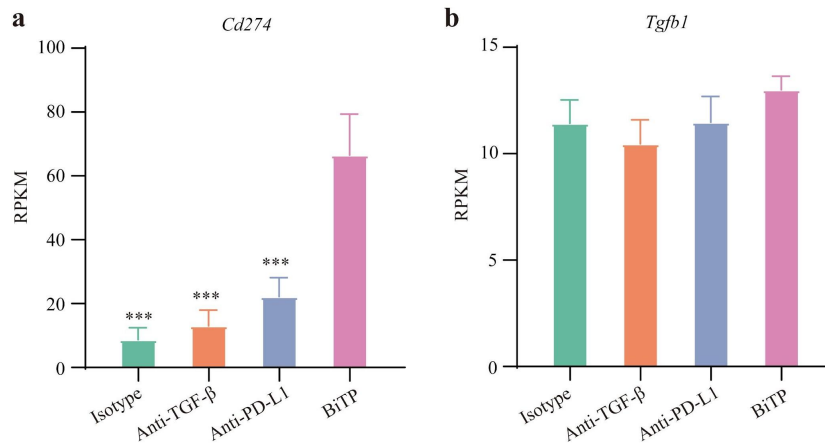

**Table S1: The information about the RNA-seq library preparation and sequencing type.**

| <b>Parameter</b>          | <b>Value</b>            |
|---------------------------|-------------------------|
| Read length               | PE-150                  |
| Strandness of the library | Strand-specific RNA-seq |
| Sequencing model          | Paired-end              |
| Enrichment strategy       | polyA selection         |
| Sequencing depth          | 6G                      |
| Gene annotation           | Mus musculus.GRCm38     |

**Table S2: RNA-seq quality metrics of all samples in the RNA-seq assay.**

| Sample           | Raw Reads | Raw Bases(G) | Raw Q20(%) | Raw Q30(%) | Raw GC(%) | Clean Reads | Clean Bases(G) |
|------------------|-----------|--------------|------------|------------|-----------|-------------|----------------|
| CTL1             | 42544940  | 6.38         | 96.82      | 92.26      | 53.57     | 36162334    | 5.24           |
| CTL2             | 48089046  | 7.21         | 96.93      | 92.54      | 53.77     | 41460218    | 5.94           |
| CTL3             | 44537806  | 6.68         | 97.08      | 92.89      | 53.48     | 38706156    | 5.58           |
| CTL4             | 43858652  | 6.58         | 97.15      | 92.96      | 53.73     | 38203520    | 5.44           |
| $\alpha$ -TGF1   | 42595106  | 6.39         | 97.32      | 93.28      | 53.51     | 37355198    | 5.41           |
| $\alpha$ -TGF2   | 46827094  | 7.02         | 97.28      | 93.24      | 53.63     | 40970524    | 5.92           |
| $\alpha$ -TGF3   | 40434076  | 6.07         | 97.1       | 92.84      | 53.79     | 34958072    | 5.02           |
| $\alpha$ -TGF4   | 41247994  | 6.19         | 96.86      | 92.39      | 53.74     | 35233622    | 5.07           |
| $\alpha$ -PDL1_1 | 44407064  | 6.66         | 97.09      | 92.91      | 53.86     | 38581268    | 5.58           |
| $\alpha$ -PDL1_2 | 45478208  | 6.82         | 96.88      | 92.63      | 54.13     | 39372220    | 5.61           |
| $\alpha$ -PDL1_3 | 52705070  | 7.91         | 96.95      | 92.53      | 53.65     | 45272198    | 6.53           |
| $\alpha$ -PDL1_4 | 40712274  | 6.11         | 97.17      | 93.02      | 53.62     | 35433356    | 5.08           |
| BiTP_1           | 44612128  | 6.69         | 96.99      | 92.75      | 53.75     | 38771740    | 5.59           |
| BiTP_2           | 46358050  | 6.95         | 96.81      | 92.23      | 53.86     | 39337766    | 5.71           |
| BiTP_3           | 40497030  | 6.07         | 96.82      | 92.39      | 54.01     | 34767182    | 4.96           |
| BiTP_4           | 46178150  | 6.93         | 97.12      | 92.87      | 53.68     | 39922434    | 5.84           |

To be continued

**Table S2 continued**

| Sample         | Clean Q20(%) | Clean Q30(%) | Clean GC(%) | Effective Rate(%) | total_reads | total_mapped(%) |
|----------------|--------------|--------------|-------------|-------------------|-------------|-----------------|
| CTL1           | 98.85        | 95.56        | 53.69       | 85                | 26479738    | 25083120(94.73) |
| CTL2           | 98.9         | 95.74        | 53.81       | 86.22             | 29968542    | 28156180(93.95) |
| CTL3           | 98.97        | 95.94        | 53.58       | 86.91             | 28100438    | 26470435(94.20) |
| CTL4           | 98.99        | 96.01        | 53.77       | 87.11             | 27521604    | 25757652(93.59) |
| $\alpha$ -TGF1 | 99           | 96.04        | 53.61       | 87.7              | 31676780    | 29628810(93.53) |
| $\alpha$ -TGF2 | 99.02        | 96.09        | 53.75       | 87.49             | 33258248    | 31359501(94.29) |
| $\alpha$ -TGF3 | 98.96        | 95.9         | 53.85       | 86.46             | 29095570    | 27372344(94.08) |

|                  |       |       |       |       |          |                     |
|------------------|-------|-------|-------|-------|----------|---------------------|
| $\alpha$ -TGF4   | 98.88 | 95.68 | 53.91 | 85.42 | 28449988 | 27130820(95.36<br>) |
| $\alpha$ -PDL1_1 | 98.96 | 95.91 | 53.92 | 86.88 | 24369994 | 23068882(94.66<br>) |
| $\alpha$ -PDL1_2 | 98.96 | 95.92 | 54.24 | 86.57 | 27644258 | 26120153(94.49<br>) |
| $\alpha$ -PDL1_3 | 98.9  | 95.71 | 53.72 | 85.9  | 30672536 | 28951139(94.39<br>) |
| $\alpha$ -PDL1_4 | 98.99 | 96.01 | 53.71 | 87.03 | 28416910 | 26697891(93.95<br>) |
| BiTP_1           | 98.95 | 95.86 | 53.78 | 86.91 | 30713182 | 28994481(94.40<br>) |
| BiTP_2           | 98.84 | 95.53 | 54.05 | 84.86 | 28146488 | 26747005(95.03<br>) |
| BiTP_3           | 98.9  | 95.74 | 54.13 | 85.85 | 27438632 | 25737685(93.80<br>) |
| BiTP_4           | 98.93 | 95.81 | 53.8  | 86.45 | 29343014 | 27654857(94.25<br>) |

To be continued

**Table S2 continued**

| Sample           | non_unique(%) | unique(%)       | un_mapped_reads(%) | read1(%)        |
|------------------|---------------|-----------------|--------------------|-----------------|
| CTL1             | 1045088(4.17) | 24038032(95.83) | 1396618(5.27)      | 12019003(50.00) |
| CTL2             | 1230045(4.37) | 26926135(95.63) | 1812362(6.05)      | 13463043(50.00) |
| CTL3             | 1133422(4.28) | 25337013(95.72) | 1630003(5.80)      | 12668480(50.00) |
| CTL4             | 1129309(4.38) | 24628343(95.62) | 1763952(6.41)      | 12314143(50.00) |
| $\alpha$ -TGF1   | 1230980(4.15) | 28397830(95.85) | 2047970(6.47)      | 14198894(50.00) |
| $\alpha$ -TGF2   | 1272643(4.06) | 30086858(95.94) | 1898747(5.71)      | 15043403(50.00) |
| $\alpha$ -TGF3   | 1076222(3.93) | 26296122(96.07) | 1723226(5.92)      | 13148041(50.00) |
| $\alpha$ -TGF4   | 987980(3.64)  | 26142840(96.36) | 1319168(4.64)      | 13071396(50.00) |
| $\alpha$ -PDL1_1 | 948211(4.11)  | 22120671(95.89) | 1301112(5.34)      | 11060315(50.00) |
| $\alpha$ -PDL1_2 | 1056525(4.04) | 25063628(95.96) | 1524105(5.51)      | 12531787(50.00) |
| $\alpha$ -PDL1_3 | 1178159(4.07) | 27772980(95.93) | 1721397(5.61)      | 13886467(50.00) |
| $\alpha$ -PDL1_4 | 1118910(4.19) | 25578981(95.81) | 1719019(6.05)      | 12789472(50.00) |
| BiTP_1           | 1129458(3.90) | 27865023(96.10) | 1718701(5.60)      | 13932489(50.00) |
| BiTP_2           | 970134(3.63)  | 25776871(96.37) | 1399483(4.97)      | 12888426(50.00) |
| BiTP_3           | 1018225(3.96) | 24719460(96.04) | 1700947(6.20)      | 12359714(50.00) |
| BiTP_4           | 1159060(4.19) | 26495797(95.81) | 1688157(5.75)      | 13247879(50.00) |

To be continued

**Table S2 continued**

| Sample           | reads_map_plus(%) | reads_map_minus(%) | non_splice_reads(%) | splice_reads(%) |
|------------------|-------------------|--------------------|---------------------|-----------------|
| CTL1             | 12019016(50.00)   | 12019016(50.00)    | 11397570(47.41)     | 12640462(52.59) |
| CTL2             | 13463060(50.00)   | 13463075(50.00)    | 12766655(47.41)     | 14159480(52.59) |
| CTL3             | 12668499(50.00)   | 12668514(50.00)    | 12030219(47.48)     | 13306794(52.52) |
| CTL4             | 12314168(50.00)   | 12314175(50.00)    | 11777913(47.82)     | 12850430(52.18) |
| $\alpha$ -TGF1   | 14198909(50.00)   | 14198921(50.00)    | 13778281(48.52)     | 14619549(51.48) |
| $\alpha$ -TGF2   | 15043422(50.00)   | 15043436(50.00)    | 14223887(47.28)     | 15862971(52.72) |
| $\alpha$ -TGF3   | 13148056(50.00)   | 13148066(50.00)    | 12544773(47.71)     | 13751349(52.29) |
| $\alpha$ -TGF4   | 13071412(50.00)   | 13071428(50.00)    | 12248516(46.85)     | 13894324(53.15) |
| $\alpha$ -PDL1_1 | 11060328(50.00)   | 11060343(50.00)    | 10437516(47.18)     | 11683155(52.82) |
| $\alpha$ -PDL1_2 | 12531805(50.00)   | 12531823(50.00)    | 11739231(46.84)     | 13324397(53.16) |
| $\alpha$ -PDL1_3 | 13886487(50.00)   | 13886493(50.00)    | 13070671(47.06)     | 14702309(52.94) |
| $\alpha$ -PDL1_4 | 12789491(50.00)   | 12789490(50.00)    | 12227885(47.80)     | 13351096(52.20) |
| BiTP_1           | 13932505(50.00)   | 13932518(50.00)    | 13328189(47.83)     | 14536834(52.17) |
| BiTP_2           | 12888435(50.00)   | 12888436(50.00)    | 11989806(46.51)     | 13787065(53.49) |
| BiTP_3           | 12359728(50.00)   | 12359732(50.00)    | 11860945(47.98)     | 12858515(52.02) |

---

BiTP\_4      13247894(50.00)      13247903(50.00)      12776084(48.22)      13719713(51.78)

---

To be continued

**Table S2 continued**

| Sample           | Ribosomal RNA(%) | CDS(%)          | Intergenic(%) | Intron(%)     |
|------------------|------------------|-----------------|---------------|---------------|
| CTL1             | 1191942(2.8016)  | 32272736(79.06) | 1108148(2.71) | 2193525(5.37) |
| CTL2             | 1335490(2.7771)  | 35892328(78.72) | 1283718(2.82) | 2322260(5.09) |
| CTL3             | 1236392(2.7761)  | 33847854(78.83) | 1205539(2.81) | 2349160(5.47) |
| CTL4             | 1150178(2.6225)  | 32707437(78.69) | 1154008(2.78) | 2228266(5.36) |
| $\alpha$ -TGF1   | 1161648(2.7272)  | 33985867(79.54) | 1130817(2.65) | 2167668(5.07) |
| $\alpha$ -TGF2   | 1218798(2.6028)  | 37380457(79.23) | 1238716(2.63) | 2409929(5.11) |
| $\alpha$ -TGF3   | 1258866(3.1134)  | 33814806(78.82) | 1183629(2.76) | 2192367(5.11) |
| $\alpha$ -TGF4   | 1158354(2.8083)  | 34987404(78.35) | 1239759(2.78) | 2390527(5.35) |
| $\alpha$ -PDL1_1 | 1652868(3.7221)  | 36795906(79.29) | 1237541(2.67) | 2263656(4.88) |
| $\alpha$ -PDL1_2 | 1336120(2.9379)  | 37309967(78.33) | 1281135(2.69) | 2518135(5.29) |
| $\alpha$ -PDL1_3 | 1482514(2.8128)  | 40299172(79.05) | 1358412(2.66) | 2577555(5.06) |
| $\alpha$ -PDL1_4 | 1179774(2.8978)  | 33925250(78.68) | 1180166(2.74) | 2252495(5.22) |
| BiTP_1           | 1217224(2.7285)  | 37008941(78.78) | 1196209(2.55) | 2468287(5.25) |
| BiTP_2           | 1156220(2.4941)  | 34869998(79.62) | 1017047(2.32) | 2098543(4.79) |
| BiTP_3           | 1177266(2.907)   | 32712575(78.69) | 1058493(2.55) | 2101760(5.06) |
| BiTP_4           | 1397082(3.0254)  | 35293640(79.46) | 1061350(2.39) | 2187741(4.93) |

To be continued

**Table S2 continued**

| Sample           | number of genes | PCR duplicates Reads | PCR replicates (%) |
|------------------|-----------------|----------------------|--------------------|
| CTL1             | 26032           | 9682596              | 26.78%             |
| CTL2             | 25595           | 11491676             | 27.72%             |
| CTL3             | 26072           | 10605718             | 27.40%             |
| CTL4             | 26078           | 10681916             | 27.96%             |
| $\alpha$ -TGF1   | 26472           | 9710940              | 26.00%             |
| $\alpha$ -TGF2   | 25765           | 10297988             | 25.14%             |
| $\alpha$ -TGF3   | 25765           | 6789978              | 25.14%             |
| $\alpha$ -TGF4   | 26324           | 5890608              | 19.42%             |
| $\alpha$ -TGF4   | 25480           | 8480854              | 16.72%             |
| $\alpha$ -PDL1_1 | 25844           | 7695426              | 21.98%             |
| $\alpha$ -PDL1_2 | 25339           | 12013950             | 19.55%             |
| $\alpha$ -PDL1_3 | 24960           | 7016446              | 26.54%             |
| $\alpha$ -PDL1_4 | 26162           | 8058558              | 19.80%             |
| BiTP_1           | 25045           | 11191278             | 20.78%             |
| BiTP_2           | 25667           | 7328550              | 28.45%             |
| BiTP_3           | 24527           | 11472446             | 21.08%             |
| BiTP_4           | 25352           |                      | 28.74%             |

Note: Raw sequencing data was first filtered by fastp (version 0.23.1) (overall Q30% > 90%). Then, low-quality reads were discarded, and the reads contaminated with adaptor sequences were trimmed.
